# Supplementary material for: Fingerloop activates cargo delivery and unloading during cotranslational protein targeting
Source: PubMed Central journal article supplement — Mol Biol Cell. 2013 Jan 15;24(2):63–73. doi: 10.1091/mbc.E12-06-0434 (PMC3541965; doi:10.1091/mbc.e12-06-0434), 2013-01-15
Supplement: supp_E12-06-0434_CombinedSupMats.pdf [file supp_E12-06-0434_CombinedSupMats.pdf]

## SUPPLEMENTARY INFORMATION

### **Fingerloop activates cargo delivery and unloading during co-translational protein targeting**

Aileen R. Ariosa\*, Stacy S. Duncan<sup>†‡</sup>, Ishu Saraogi\*, Xiaodong Lu<sup>†</sup>, April Brown<sup>†</sup>, Gregory J. Phillips<sup>†</sup>, and Shu-ou Shan\*<sup>§</sup>

\*Division of Chemistry and Chemical Engineering, California Institute of Technology, Pasadena, CA 91125

<sup>†</sup>Department of Veterinary Microbiology, College of Veterinary Medicine, Veterinary Medical Research Institute (VMRI), Iowa State University, Ames, IA 50011

<sup>‡</sup>Present Address: Department of Medicine, Division of Infectious Diseases, Vanderbilt University, Nashville, TN 37232

<sup>§</sup>Corresponding author. E-mail: [sshan@caltech.edu](mailto:sshan@caltech.edu)

**Figure S1.** Expression of *ffh* alleles analyzed by SDS-PAGE. Proteins were resolved and detected as described in Materials and Methods. Lanes 1-2: *ffh*PG→AA; 3-4: *ffh*ΔFL; 5-6: *ffh*<sup>+</sup>, 7-8: *ffh*LM→AA. Lanes 1, 3 5, 7: + L-arabinose; 2, 4, 6, 8: - L-arabinose. Molecular weight standards are shown on the left, the relative positions of which were identified using a corresponding SDS-PAGE gel stained with Coomassie Brilliant Blue.

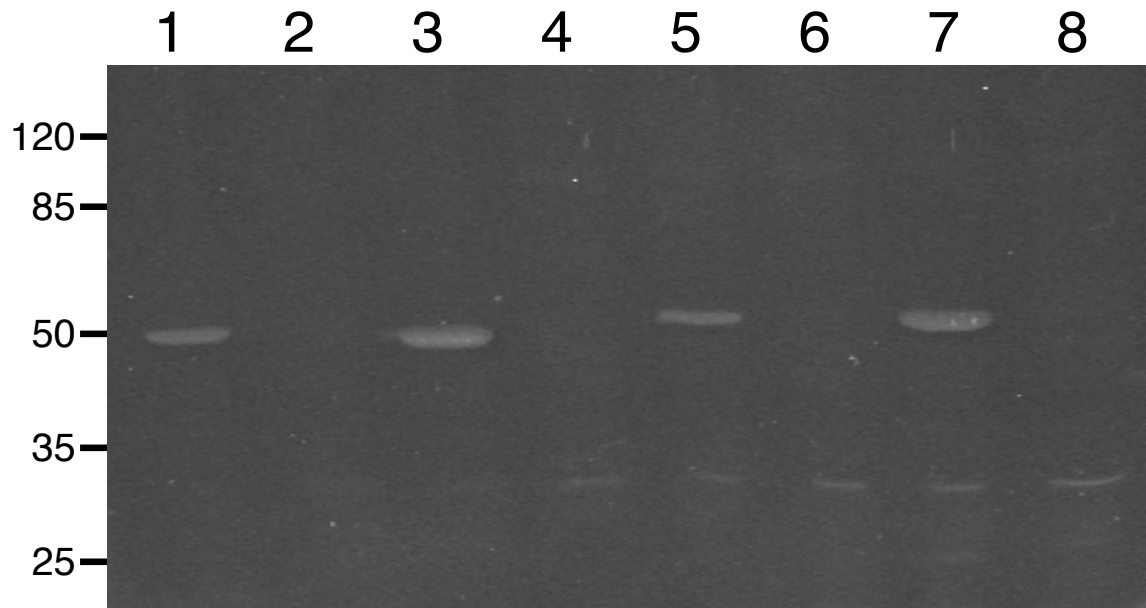

**Figure S2.** The effects of fingerloop mutants on SRP-FtsY complex assembly. Measurements of SRP-FtsY complex assembly kinetics of wild-type SRP (●), mutant SRP( $\Delta$ FL) (○) and mutant SRP(LM $\rightarrow$ AA) (◇) in the presence of Nikkol.

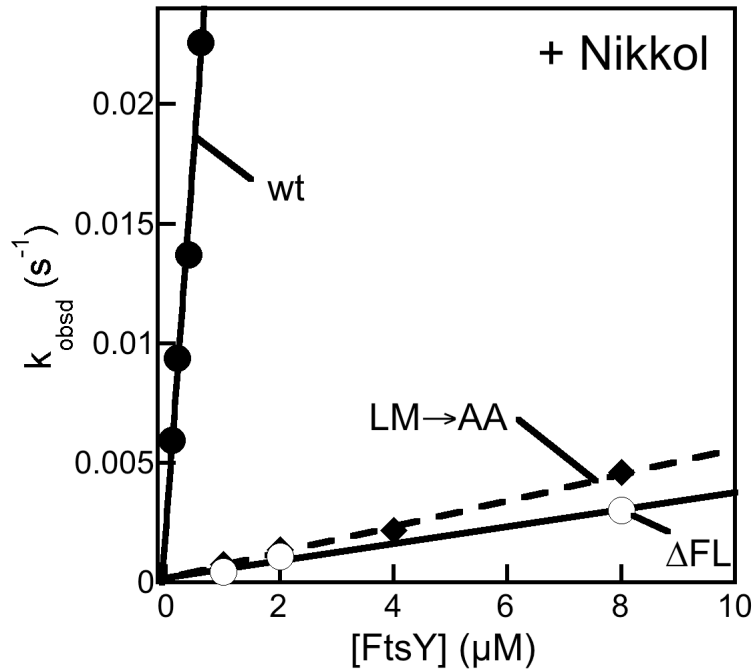

**Figure S3.** Effects of the fingerloop on the equilibrium stability of the early complex in the presence of  $\text{RNC}_{\text{FtsQ}}$ .

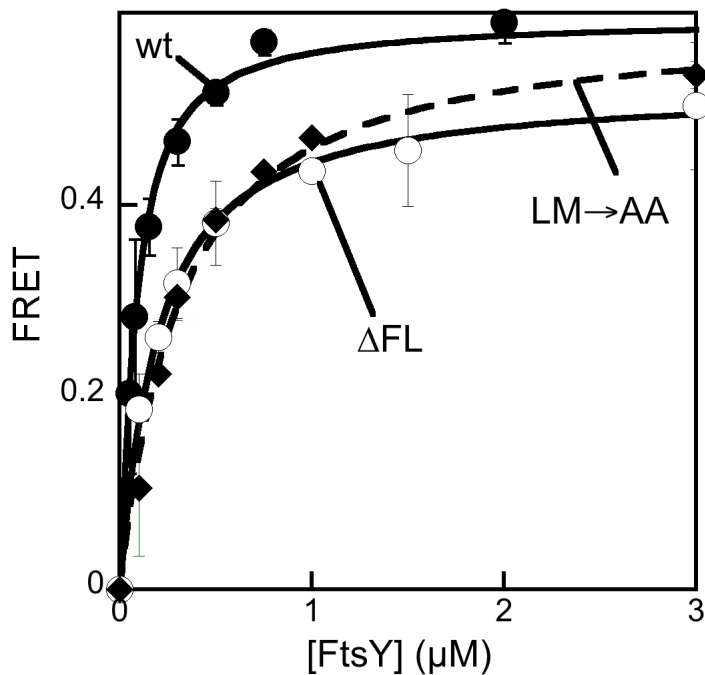

**Figure S4.** Rate constants for formation of the stable complex starting from a preformed RNC•SRP•FtsY early complex using either (A) SRP( $\Delta$ FL) or (B) SRP(LM $\rightarrow$ AA).

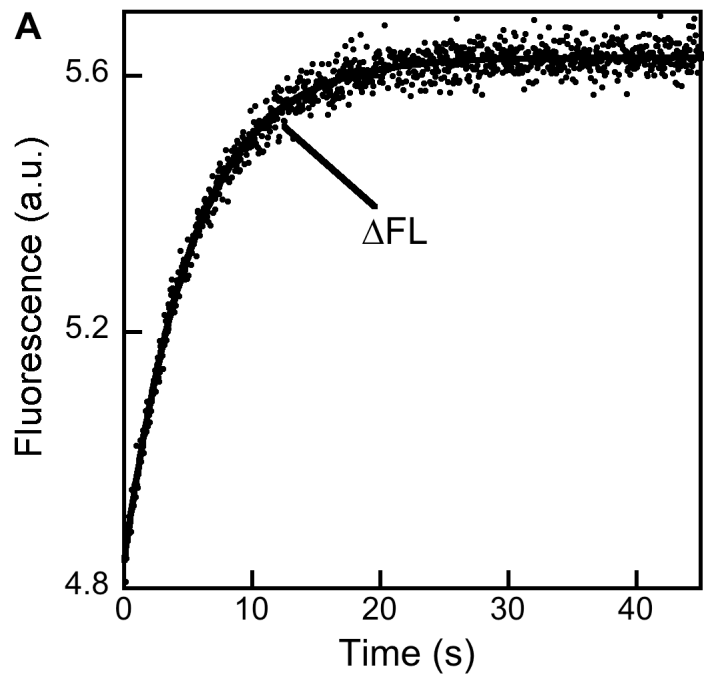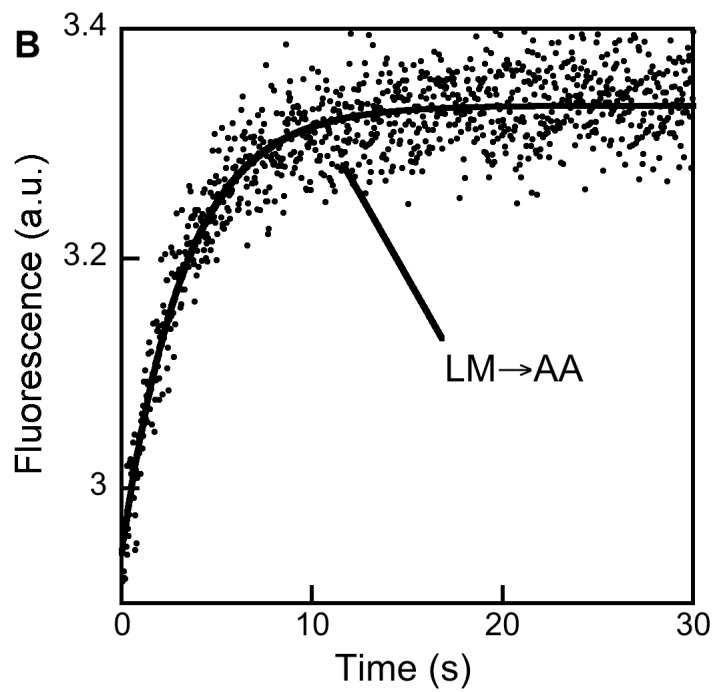

**Figure S5.** Deletion of the fingerloop results in inefficient GTPase activation. (A) The reciprocally stimulated GTPase reaction between SRP and FtsY were determined for wild-type SRP (●) and mutants SRP(LM→AA) (◇) and SRP(ΔFL) (○). The data were fit to Eq. 3 in the *Methods*. (B) Summary of the  $k_{\text{cat}}$  and  $K_{\text{m}}$  values from the data in part A.

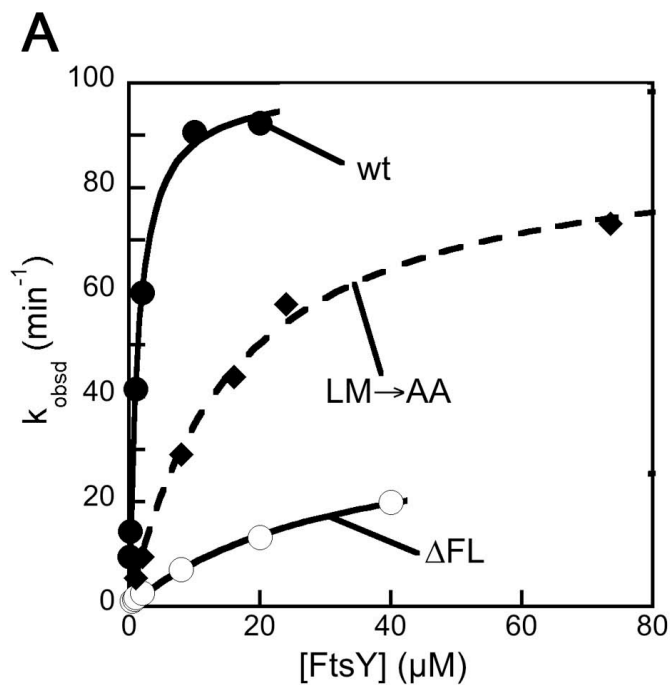

**B**

|                                                                        | SRP     | ΔFL        | LM→AA     |
|------------------------------------------------------------------------|---------|------------|-----------|
| $k_{\text{cat}}$ ( $\text{min}^{-1}$ )                                 | 100 (1) | 36 (0.36)  | 90 (0.90) |
| $K_{\text{M}}$ ( $\mu\text{M}$ )                                       | 1.3 (1) | 32 (25)    | 6 (4.6)   |
| $k_{\text{cat}}/K_{\text{M}}$<br>( $\mu\text{M}^{-1}\text{min}^{-1}$ ) | 77 (1)  | 1.1 (0.01) | 15 (0.19) |
